# Supplementary material
Source: PubMed Central journal article supplement (PMC6187144)
Supplement: pnas.1813187115.sapp.pdf [file pnas.1813187115.sapp.pdf]

# Conductively Coupled Flexible Silicon Electronic Systems for Chronic Neural Electrophysiology

Jinghua Li<sup>a,b,1</sup>, Enming Song<sup>a,c,1</sup>, Chia-Han Chiang<sup>d</sup>, Ki Jun Yu<sup>e</sup>, Jahyun Koo<sup>a,b</sup>, Haina Du<sup>a</sup>, Yishan Zhong<sup>a</sup>, Mackenna Hill<sup>d</sup>, Charles Wang<sup>d</sup>, Jize Zhang<sup>a</sup>, Yisong Chen<sup>a</sup>, Limei Tian<sup>f</sup>, Yiding Zhong<sup>a</sup>, Guanhua Fang<sup>a</sup>, Jonathan Viventi<sup>d</sup>, John A. Rogers<sup>a,b,c,g,h,i,j,k,l,m,2</sup>

<sup>a</sup> Department of Materials Science and Engineering, Frederick Seitz Materials Research Laboratory, University of Illinois at Urbana–Champaign, Illinois 61801, United States

<sup>b</sup> Departments of Materials Science and Engineering, Northwestern University, Evanston, IL 60208, United States

<sup>c</sup> Center for Bio-Integrated Electronics, Northwestern University, Evanston, IL 60208, United States

<sup>d</sup> Department of Biomedical Engineering, Duke University, Durham, North Carolina 27708, United States

<sup>e</sup> Department of Electrical and Electronic Engineering, Yonsei University, Seoul 03722, Republic of Korea

<sup>f</sup> Beckman Institute for Advanced Science and Technology, University of Illinois at Urbana–Champaign, Urbana, Illinois 61801, United States

<sup>g</sup> Department of Biomedical Engineering, Northwestern University, Evanston, IL 60208, United States

<sup>h</sup> Department of Chemistry, Northwestern University, Evanston, IL 60208, United States

<sup>i</sup> Department of Mechanical Engineering, Northwestern University, Evanston, IL 60208, United States

<sup>j</sup> Department of Electrical Engineering and Computer Science, Northwestern University, Evanston, IL 60208, United States

<sup>k</sup> Simpson Querrey Institute, Northwestern University, Evanston, IL 60208, United States

<sup>l</sup> Feinberg School of Medicine, Northwestern University, Evanston, IL 60208, United States

<sup>m</sup> Department of Neurological Surgery, Northwestern University, Evanston, IL 60208, United States

<sup>1</sup> These authors contributed equally to this work.

<sup>2</sup> Corresponding author. E-mail: [jrogers@northwestern.edu](mailto:jrogers@northwestern.edu) (J.A.R)

Keywords: thin film encapsulation, Faradaic contact, flexible electronics, bio-integrated electronics, chronic implant, biomedical devices

## **Supplementary Information**

Supplementary Note 1

Supplementary Figure Legends

Supplementary Figure S1-S19

### **Supplementary Note 1: Step-by-step process flow to fabricate sealed and conductive coupled flexible active arrays.**

#### **Wafer back grinding**

1. Start with SOI wafer (200 nm device Si, 1  $\mu\text{m}$  BOX layer, 500  $\mu\text{m}$  handle wafer, Soitec);
2. Grind handle wafer to 200  $\mu\text{m}$  by Syagrus Systems;
3. Cut the wafer into chips of device size;

#### **P-doping**

4. RCA cleaning of SOI wafers;
5. Dry thermal oxidation to form 200 nm  $\text{SiO}_2$  at 1150  $^\circ\text{C}$ ;
6. Photolithography to define sensing pad doping area using photoresist (PR) (AZ 5214E);
7. RIE to dry etch  $\text{SiO}_2$ , (a) 50 mTorr of  $\text{CF}_4/\text{O}_2$  (40/1.2 sccm), with RF power of 100 W for 5min, (b) gentle  $\text{O}_2$  plasma, 50 mTorr, 20 sccm of  $\text{O}_2$ , with RF power of 100 W for 20 s;
8. BOE (10:1) wet etch  $\text{SiO}_2$  for 5 min;
9. PR strip by acetone, isopropanol and blow dry;
10. RCA cleaning;
11. Dope sensing pad area with diffusive boron source at 1000  $^\circ\text{C}$  for 15 min;

12. Wet etch SiO<sub>2</sub> doping mask using 49% HF for 20 s; and DI rinse;
13. RCA cleaning;

### **N-doping**

14. Deposit 400 nm PECVD SiO<sub>2</sub> as diffusion mask;
15. Photolithography to define S/D doping area using photoresist (PR) (AZ 5214E);
16. RIE to dry etch SiO<sub>2</sub>, (a) 50 mTorr of CF<sub>4</sub>/O<sub>2</sub> (40/1.2 sccm), with RF power of 100 W for 15 min, (b) gentle O<sub>2</sub> plasma, 50 mTorr, 20 sccm of O<sub>2</sub>, with RF power of 100 W for 20 s;
17. BOE (10:1) wet etch SiO<sub>2</sub> for 5 min;
18. PR strip by acetone, isopropanol and blow dry;
19. RCA cleaning;
20. Dope S/D area with diffusive phosphorus source at 1000 °C for 7 min;
21. Wet etch SiO<sub>2</sub> doping mask using 49% HF for 20 s; and DI rinse;
22. RCA cleaning;

### **Si isolation**

23. Photolithography to define Si isolation area using PR (AZ 5214E);
24. RIE to dry etch Si (50 mTorr, 40 sccm of SF<sub>6</sub>, with RF power of 100 W for 1 min);
25. PR stripe by acetone, IPA and blow dry;

### **Gate stack deposition**

26. RCA cleaning;
27. Dry thermal oxidation to form 50 nm SiO<sub>2</sub> at 1150 °C for 15 min;
28. Deposit 13 nm (130 cycles) Al<sub>2</sub>O<sub>3</sub> at 80 °C using an Atomic Layer Deposition (ALD) system;

## **Via 0**

29. Photolithography to define S/D and sensing pad opening via using PR (AZ 5214E);
30. Gentle O<sub>2</sub> plasma using RIE (50 mTorr, 20 sccm of O<sub>2</sub>, with RF power of 100 W for 20 s);
31. BOE (6:1) to etch gate dielectric for 2 min;
32. PR stripe by acetone soaking, IPA and blow dry;

## **Metal 1**

33. Deposit Cr/Au, 10/300 nm with an electron-beam evaporator;
34. Photolithography to define metal 1 using PR (AZ 5214E);
35. Au, Cr wet etching using Au, Cr etchant respectively;
36. PR stripe by acetone, IPA and blow dry;
37. Measure test transistors;

## **Interlayer PI 2545**

38. Clean samples using acetone, IPA, DI, and blow dry;
39. Dehydration: bake samples at 110 °C for 5 min;
40. Spin coat PI adhesion promoter (VM 652) using 500 rpm 5s, hold 20s, 3000 rpm 30s; soft bake at 110 °C for 1 min;
41. PI coating: spin coat PI 2545 precursor at 4000 rpm for 30 s; soft bake at 110 °C for 2 min and 150 °C 5 min; cure at 250 °C for 70 min;

## **Via 1**

42. Photolithography to define via 1 using PR (AZ P4620);

43. RIE to etch via 1 (200 mTorr, 20 sccm O<sub>2</sub>, with RF power of 150 W for 900s);
44. Check microscope and resistance to make sure via is open;
45. PR stripe by acetone, IPA, and blow dry;

## **Metal 2**

46. Deposit Cr/Au, 10/500 nm with an e-beam evaporator;
47. Photolithography to define metal 2 using PR (AZ 5214E);
48. Au, Cr wet etching using Au, Cr etchant respectively
49. PR stripe by acetone, IPA and blow dry;
50. Measure test transistors;

## **PI substrate 2545**

51. Clean samples using acetone, IPA, DI, and blow dry;
52. Dehydration: bake samples at 110 °C for 5 min;
53. Spin coat VM 652 using 500 rpm 5s, hold 20s, 3000 rpm 30s; soft bake at 110 °C for 1 min;
54. PI coating: spin coat PI 2545 precursor at 3000 rpm for 30 s; soft bake at 110 °C for 2 min and 150 °C for 6 min; cure at 250 °C for 70 min;

## **Pre-conditioning before bonding**

55. Deposit 20 nm Al<sub>2</sub>O<sub>3</sub> at 150 °C to the devices' PI side using ALD;
56. Deposit Ti/SiO<sub>2</sub> 5/50 nm to the devices' PI side with an electron-beam evaporator;

## **Bonding**

57. Bond devices to 13- $\mu\text{m}$  kapton films (coated with Ti/SiO<sub>2</sub> 5/20 nm) using an adhesive (Kwik-Sil, World Precision Instruments).

### **Si wafer removal**

58. Scratch off back contamination until the contamination on the back is gone;

59. Si back RIE etching (50 mTorr of SF<sub>6</sub>/O<sub>2</sub>, 40/3 sccm, with RF power of 100 W. Do 6 runs of 30 min;

60. Deep RIE to continue etching back the devices, until all the back Si is etched;

### **Via 2**

61. Photolithography to define small regions on t-SiO<sub>2</sub> aligned to the p<sup>++</sup>-Si islands using PR (AZ 5214E);

62. RIE to dry etch SiO<sub>2</sub>, (a) 50 mTorr of CF<sub>4</sub>/O<sub>2</sub> (40/1.2 sccm), with RF power 100 W for 15 min, (b) gentle O<sub>2</sub> plasma, 50 mTorr, 20 sccm of O<sub>2</sub>, with RF power 100 W;

63. BOE (6:1) wet etch SiO<sub>2</sub> for 11 min;

64. PR strip by acetone, IPA and blow dry;

### **Metal 3**

65. Deposit Cr/Au, 10/300 nm with a thermal evaporator;

66. Photolithography to define metal 3 using PR (AZ 5214E);

67. Au, Cr wet etching using Au, Cr etchant respectively

68. PR strip by acetone, IPA and blow dry;

### **Hand cutting**

69. Razor blade cut to define the device outline profile;

70. Peel off devices gently from handling substrates;

71. Stick the stiffener onto the device ZIF side under microscope; devices are then ready to be tested with the DAQ.

### Supplementary Figure Legends

**Figure S1.** Dopant concentration measured by secondary ion mass spectrometry (SIMS) for p<sup>++</sup>-Si (A) and n<sup>++</sup>-Si (B) as biofluid barriers.

**Figure S2.** A: Schematic illustration of the structure of an Mg-based passive device used in soak tests. B: Top view showing the exposed Si barrier layer.

**Figure S3.** A-B: Change in thickness of a nanomembrane of Si at different doping levels as a function of immersion time in PBS at 37 °C and 70 °C. C: Dissolution rate of p<sup>++</sup>-Si (concentration: 10<sup>20</sup> atoms/cm<sup>3</sup>) as a function of 1/T.

**Figure S4.** Statistics of lifetimes of Mg test devices encapsulated by p<sup>++</sup>-Si at 70 and 96 °C, p<sup>++</sup>-Si (170 nm) coated with 5 nm Ti/ 200 nm Pt at 70 and 96 °C, and n<sup>++</sup>-Si (170 nm) at 70 and 96 °C.

**Figure S5.** Soak tests of p<sup>++</sup>-Si as a barrier layer for arrays of passive electrodes. A: Schematic illustration passive electrode arrays encapsulated with p<sup>++</sup>-Si (170 nm). B: Display of lifetimes of 13 test devices.

**Figure S6.** Optical image, schematic illustration and photograph of an n-MOSFET (channel length: L<sub>eff</sub> = 16 μm, width: 400 μm) with p<sup>++</sup>-Si as an electrical interface (p<sup>++</sup>-Si via) through the t-SiO<sub>2</sub>, of the type used in soak tests.



**Figure S7.** Results from soak tests of an n-MOSFET with a p<sup>++</sup>-Si via in PBS solution at 65 and 70°C.

**Figure S8.** Results from soak tests of an n-MOSFET with p<sup>++</sup>-Si and Au (300 nm) on the side in contact with PBS at 60, 70 and 90°C.

**Figure S9.** Schematic illustration of the design of a 64 channel multiplexed device, showing the entire device (A) and a unit cell (B).

**Figure S10.** Procedures for fabricating flexible, sealed and conductively coupled active matrix systems.

**Figure S11.** Images of active multiplexed matrix devices after six key fabrication steps. A: Isolation of device Si (p<sup>++</sup>-Si as encapsulation layer and sensing pad, and n<sup>++</sup>-Si as backplane transistor) above the buried oxide, t-SiO<sub>2</sub>. B. Metal 1 for source, drain and gate (connecting to p<sup>++</sup>-Si), and row selects for multiplexing. C: Metal 2 for interconnection with source and drain, and column selects for signal output. D: Configuration after the removal of Si handle-wafer, with t-SiO<sub>2</sub> on the top. E: Via opening on t-SiO<sub>2</sub> to expose p<sup>++</sup>-Si underneath. F: Metal 3 for sensing pads on the tissue-contacting side.

**Figure S12.** Schematic illustration of the cross-section of the sealed and conductively coupled active sensing matrix.

**Figure S13.** Statistics of on/off ratio and subthreshold swing of test transistors from 10 different samples.

**Figure S14.** Photographs of an active matrix system before (A) and after (B) the application of a Kapton stiffener, and after insertion into an adaptor PCB board through a ZIF connector (C-D).

**Figure S15.** Schematic illustration of the data acquisition system for in vitro assessment.

**Figure S16.** Cumulative leakage current of the 64-channel multiplexed arrays over time.

**Figure S17.** Photograph of Mg electrodes with sealed structure in flexible form for immersion test in PBS at 37 °C.

**Figure S18.** Photograph of a stimulation electrode system in flexible form with an opening of  $3 \times 3 \text{ mm}^2$  to  $p^{++}\text{-Si}$  through  $t\text{-SiO}_2$ .

**Figure S19.** Sequential images of a Au thin film electrode during simulation with a voltage of 2V showing that failure occurs after 6 h.

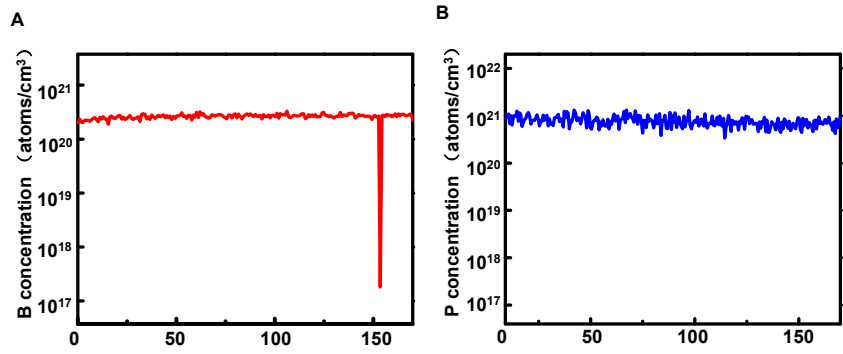

Figure S1

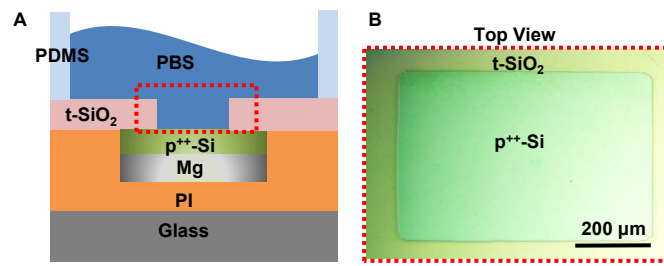

Figure S2

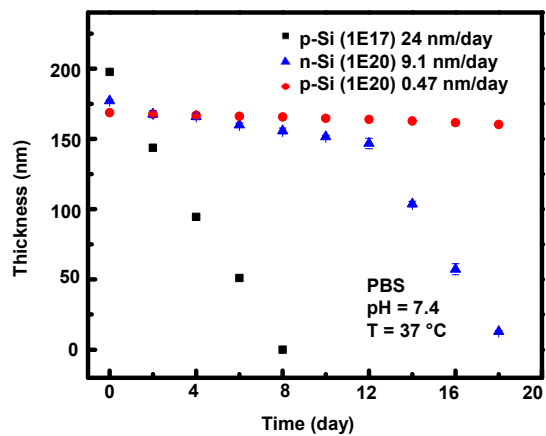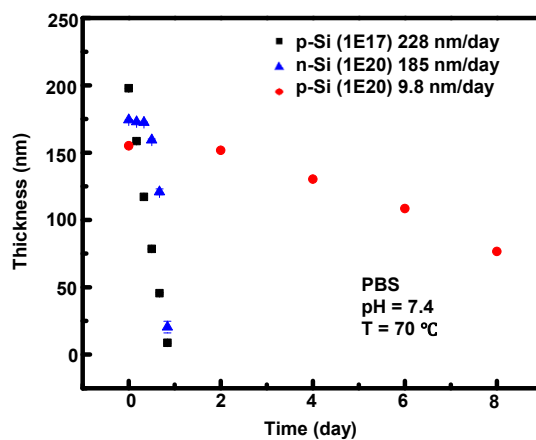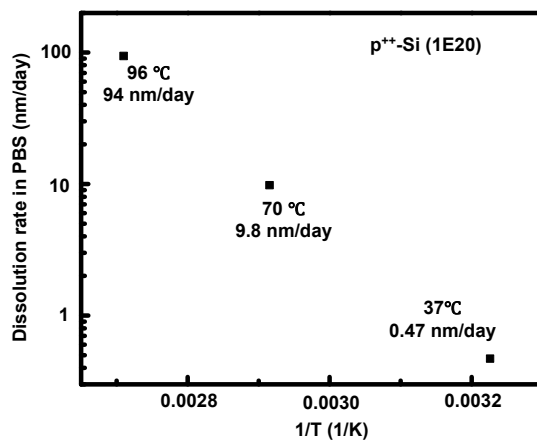

Figure S3

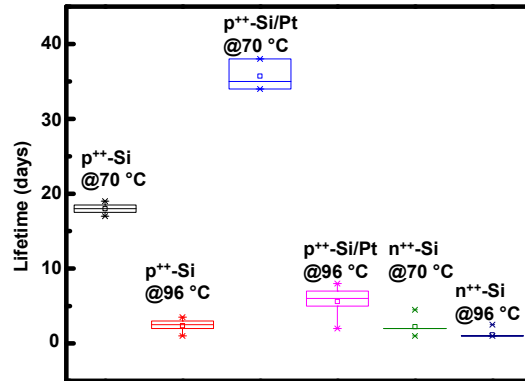

Figure S4

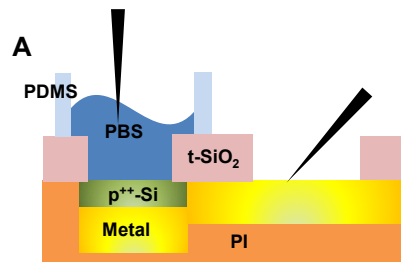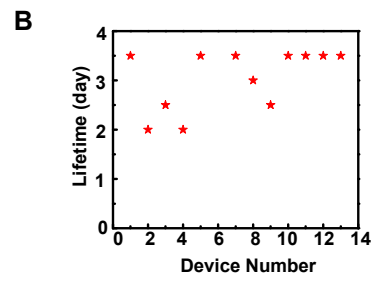

Figure S5

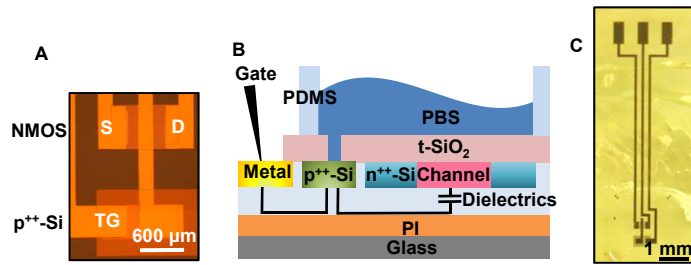

Figure S6



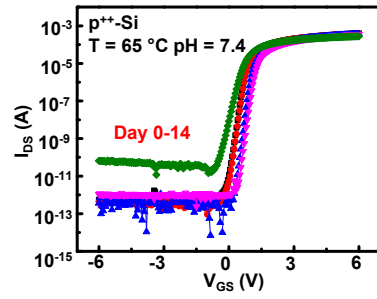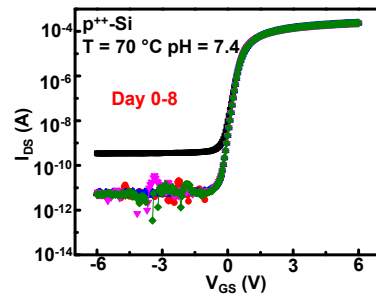

Figure S7

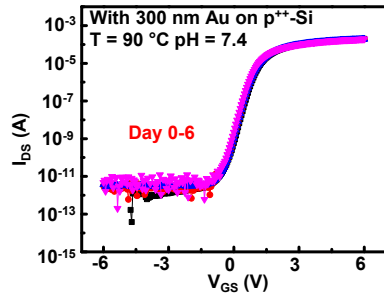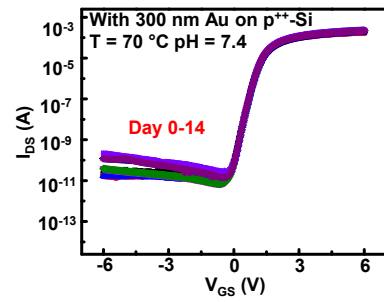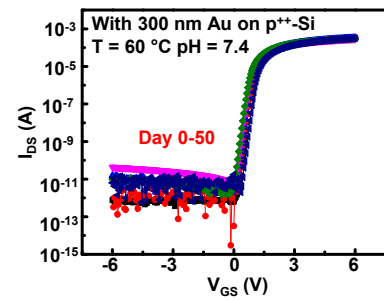

Figure S8

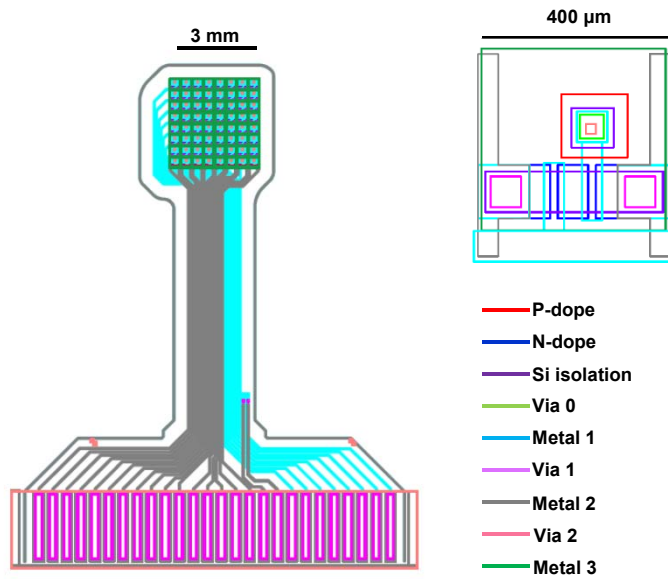

Figure S9

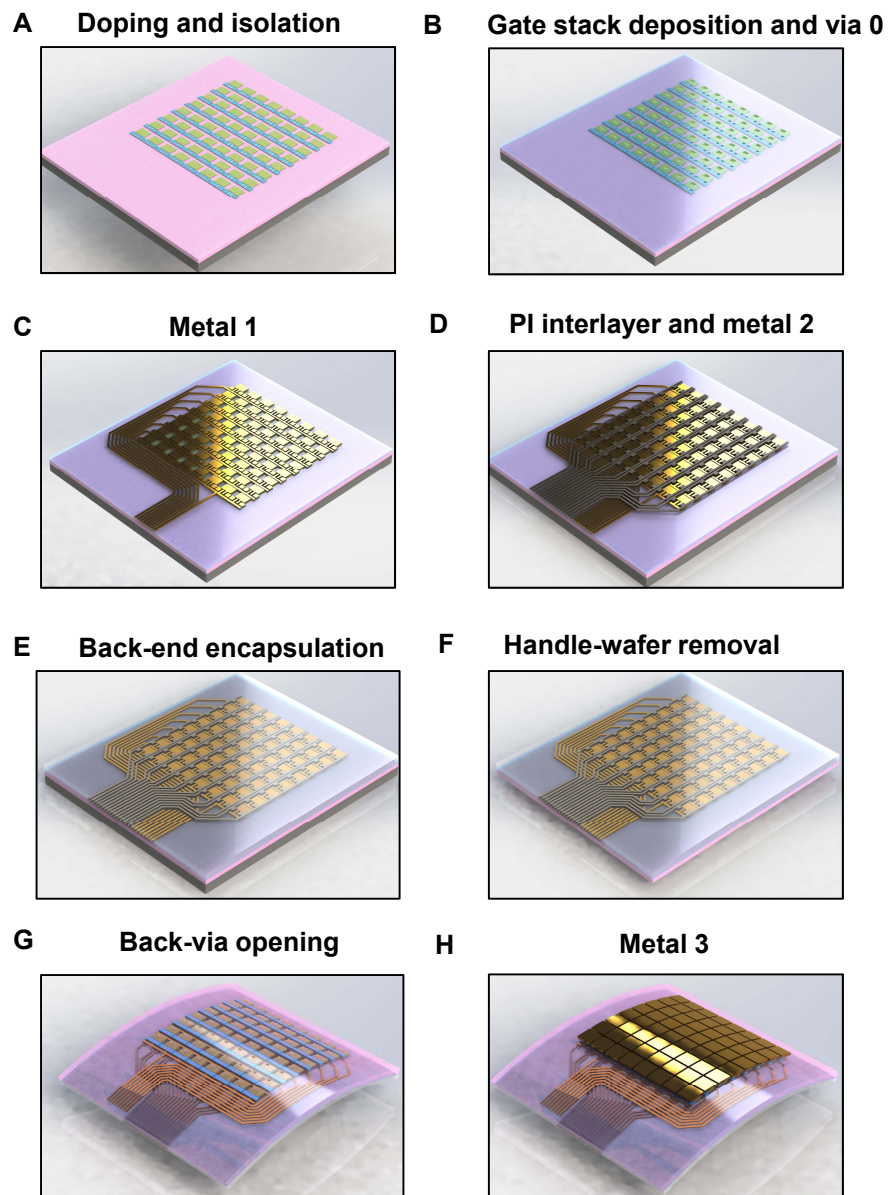

Figure S10

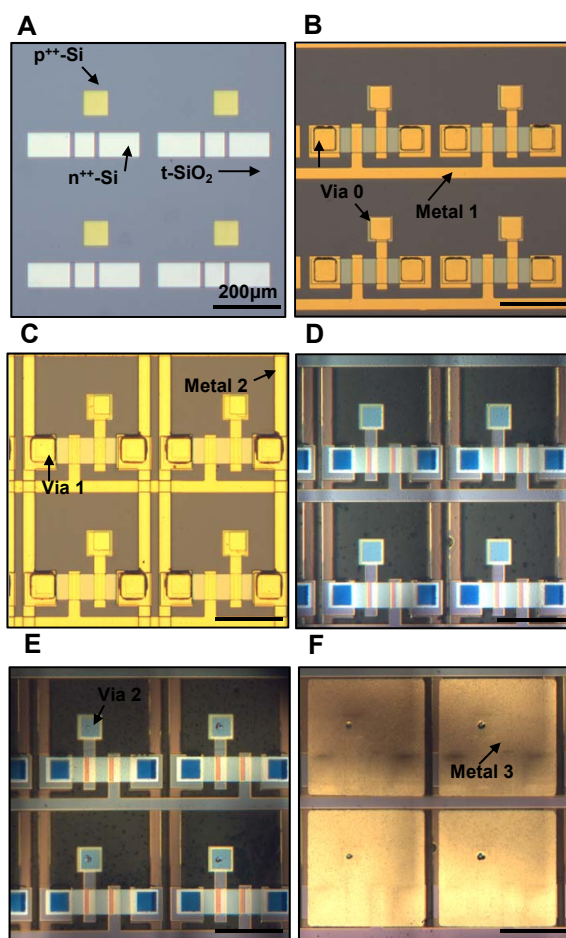

Figure S11

|       |                                        |       |
|-------|----------------------------------------|-------|
|       | Metal 3 (300 nm)                       |       |
| Via 2 | T-SiO <sub>2</sub> (1 μm)              |       |
|       | Si (60 nm)                             |       |
|       | T-SiO <sub>2</sub> (50 nm)             |       |
|       | Al <sub>2</sub> O <sub>3</sub> (13 nm) | Via 0 |
|       | Metal 1 (300 nm)                       |       |
| Via 1 | PI (1.6 μm)                            |       |
|       | Metal 2 (500 nm)                       |       |
|       | PI (2 μm)                              |       |
|       | Al <sub>2</sub> O <sub>3</sub> (20 nm) |       |
|       | Kwik Sil (20 μm)                       |       |
|       | Al <sub>2</sub> O <sub>3</sub> (20 nm) |       |
|       | Kapton film (13 μm)                    |       |

Figure S12

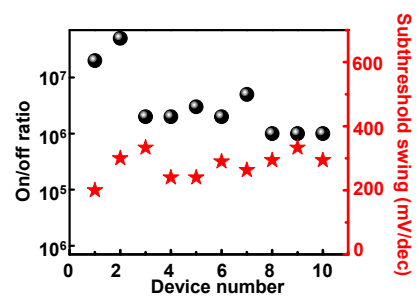

Figure S13

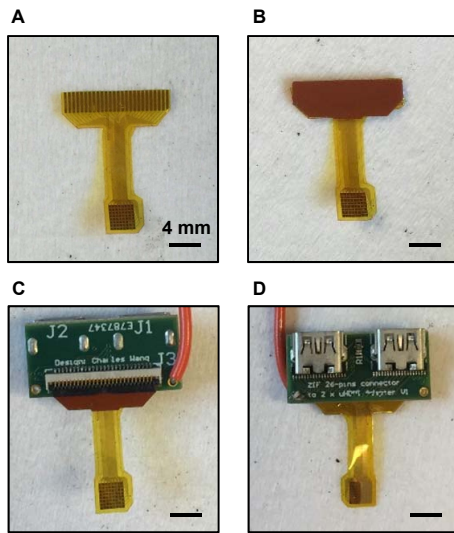

Figure S14



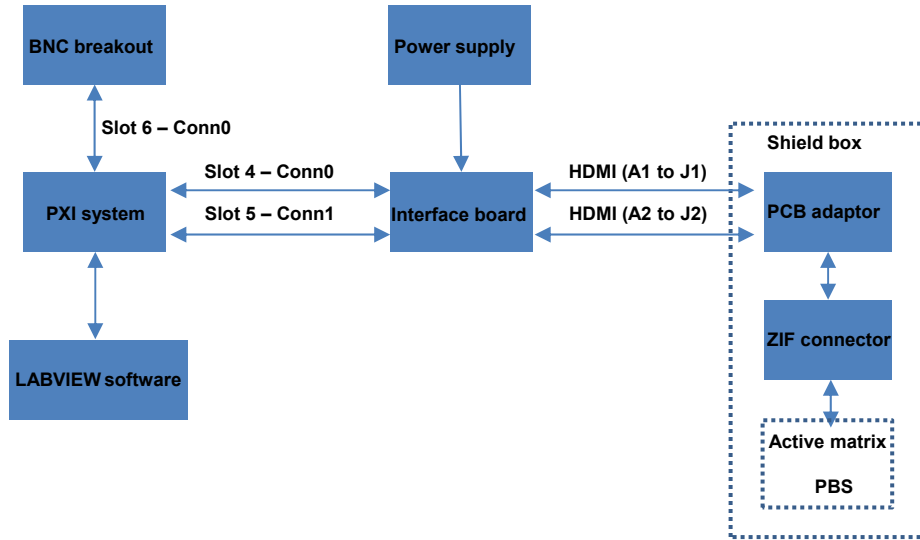

Figure S15

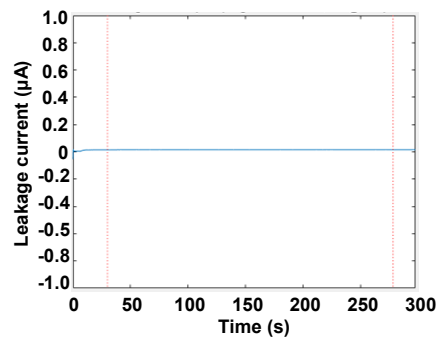

Figure S16

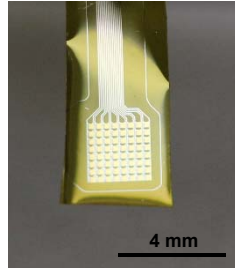

Figure S17

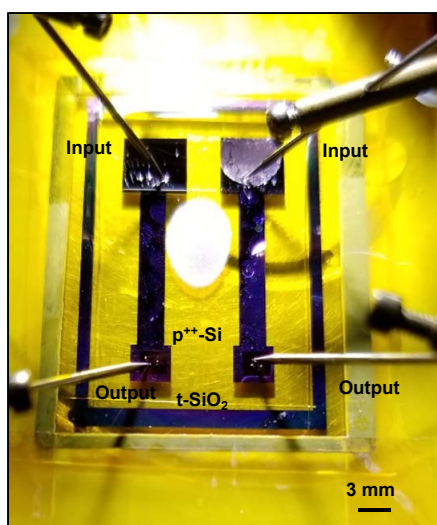

Figure S18

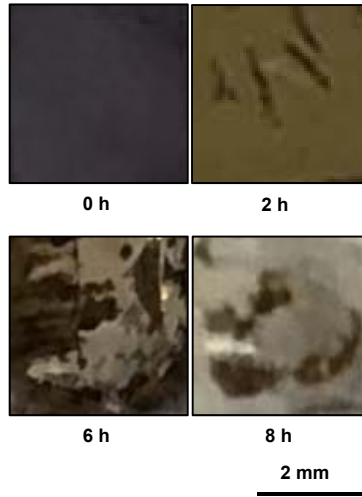

Figure S19
